# Supplementary material for: Limited Benefit of Postoperative Chemoradiotherapy in Intermediate-Risk Locally Advanced Head and Neck Squamous Cell Carcinoma: Real-World Evidence from the IMRT Era
Source: Research Square preprint supplement (doi:10.21203/rs.3.rs-7795402/v1), 2025-11-11
Supplement: Supplementary file 1 [file 3f6e016b5d7175d2eacc2ab8.docx]

Supplementary Table 1. Univariable Cox analysis of both demographic and clinicopathologic variables in matched cohort

| **Variable** | **HR (95%CI, *P* value)** | | | |
| --- | --- | --- | --- | --- |
| **OS** | **PFS** | **LRRFS** | **DMFS** |
| **Age** |  |  |  |  |
| ≥ 60y vs. < 60y | 0.94 (0.40-2.25, p=.893) | 0.84 (0.42-1.66, p=.613) | 0.85 (0.33-2.13, p=.722) | 0.31 (0.04-2.47, p=.268) |
| **Gender** |  |  |  |  |
| Male vs. Female | 4.71 (0.64-34.76, p=.129) | 2.46 (0.76-7.97, p=.132) | 2.00 (0.47-8.51, p=.349) |  |
| **T-stage** |  |  |  |  |
| pT3-T4 vs. pT1-T2 | 1.01 (0.40-2.52, p=.987) | 1.29 (0.62-2.70, p=.494) | 1.71 (0.58-5.02, p=.326) | 0.64 (0.16-2.57, p=.532) |
| **N-stage** |  |  |  |  |
| pN2-N3 vs. pN0-N1 | 1.68 (0.75-3.73, p=.204) | 1.26 (0.68-2.32, p=.460) | 0.70 (0.31-1.60, p=.402) | 1.90 (0.47-7.62, p=.364) |
| **Differentiation** |  |  |  |  |
| Well | Reference | Reference | Reference | Reference |
| Moderately | 1.18 (0.28-4.97, p=.818) | 0.73 (0.28-1.88, p=.514) | 0.59 (0.19-1.83, p=.360) | 3.79 (0.34-41.85, p=.277) |
| Poorly | 3.38 (1.25-9.17, p=.017) * | 1.26 (0.65-2.43, p=.498) | 0.58 (0.24-1.44, p=.241) | 5.30 (0.64-44.07, p=.123) |
| **PNI** |  |  |  |  |
| Positive vs. Negative | 1.38 (0.58-3.30, p=.472) | 1.79 (0.91-3.53, p=.091) * | 2.48 (1.03-5.96, p=.043) * | 2.92 (0.78-10.88, p=.111) |
| **LVI** |  |  |  |  |
| Positive vs. Negative | 4.99 (1.67-14.93, p=.004) * | 2.50 (0.88-7.12, p=.085) * | 1.08 (0.14-8.17, p=.937) | 3.44 (0.42-28.44, p=.252) |

Abbreviations: HR hazard ratio; CI confidence interval; OS overall survival; PFS progression-free survival; LRRFS local regional recurrence-free survival; DMFS distant metastasis-free survival; PNI perineural invasion; LVI lymphovascular invasion.

* *P*-value < 0.050 in univariable Cox analysis of variables.
